# Supplementary material for: Genome-resolved insights into a novelSpiroplasmasymbiont of the Wheat Stem Sawfly (Cephus cinctus)
Source: PeerJ journal article supplement (doi:10.7717/peerj.7548), 2019-08-27
Supplement: Fig_S1.pdf [file Fig_S1.pdf]

**Symbiont**  
**Wheat**

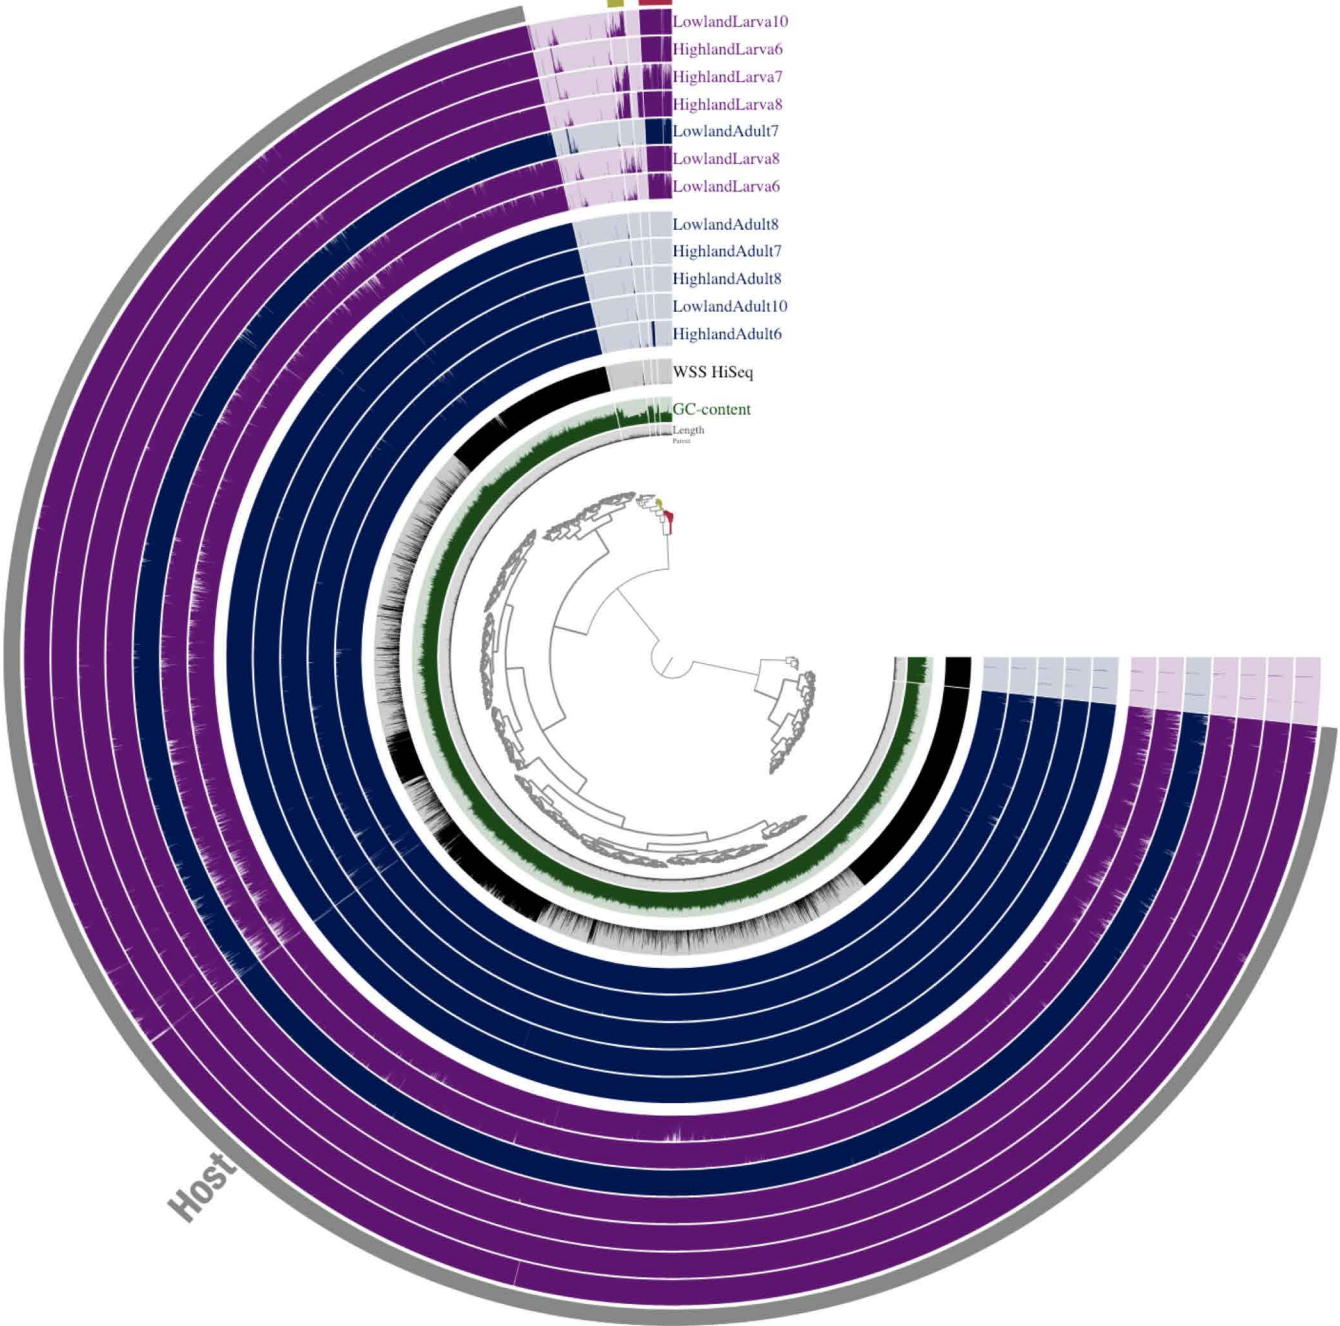

LowlandLarva10

HighlandLarva6

HighlandLarva7

HighlandLarva8

LowlandAdult7

LowlandLarva8

LowlandLarva6

LowlandAdult8

HighlandAdult7

HighlandAdult8

LowlandAdult10

HighlandAdult6

WSS HiSeq

GC-content

Length

Panc

Host
