# Supplementary material for: Genome-resolved insights into a novel Spiroplasma symbiont of the Wheat Stem Sawfly (Cephus cinctus)
Source: PubMed Central journal article supplement (PMC6716498; doi:10.7717/peerj.7548), 2019-08-27
Supplement: peerj-07-7548-s007.pdf [file peerj-07-7548-s007.pdf]

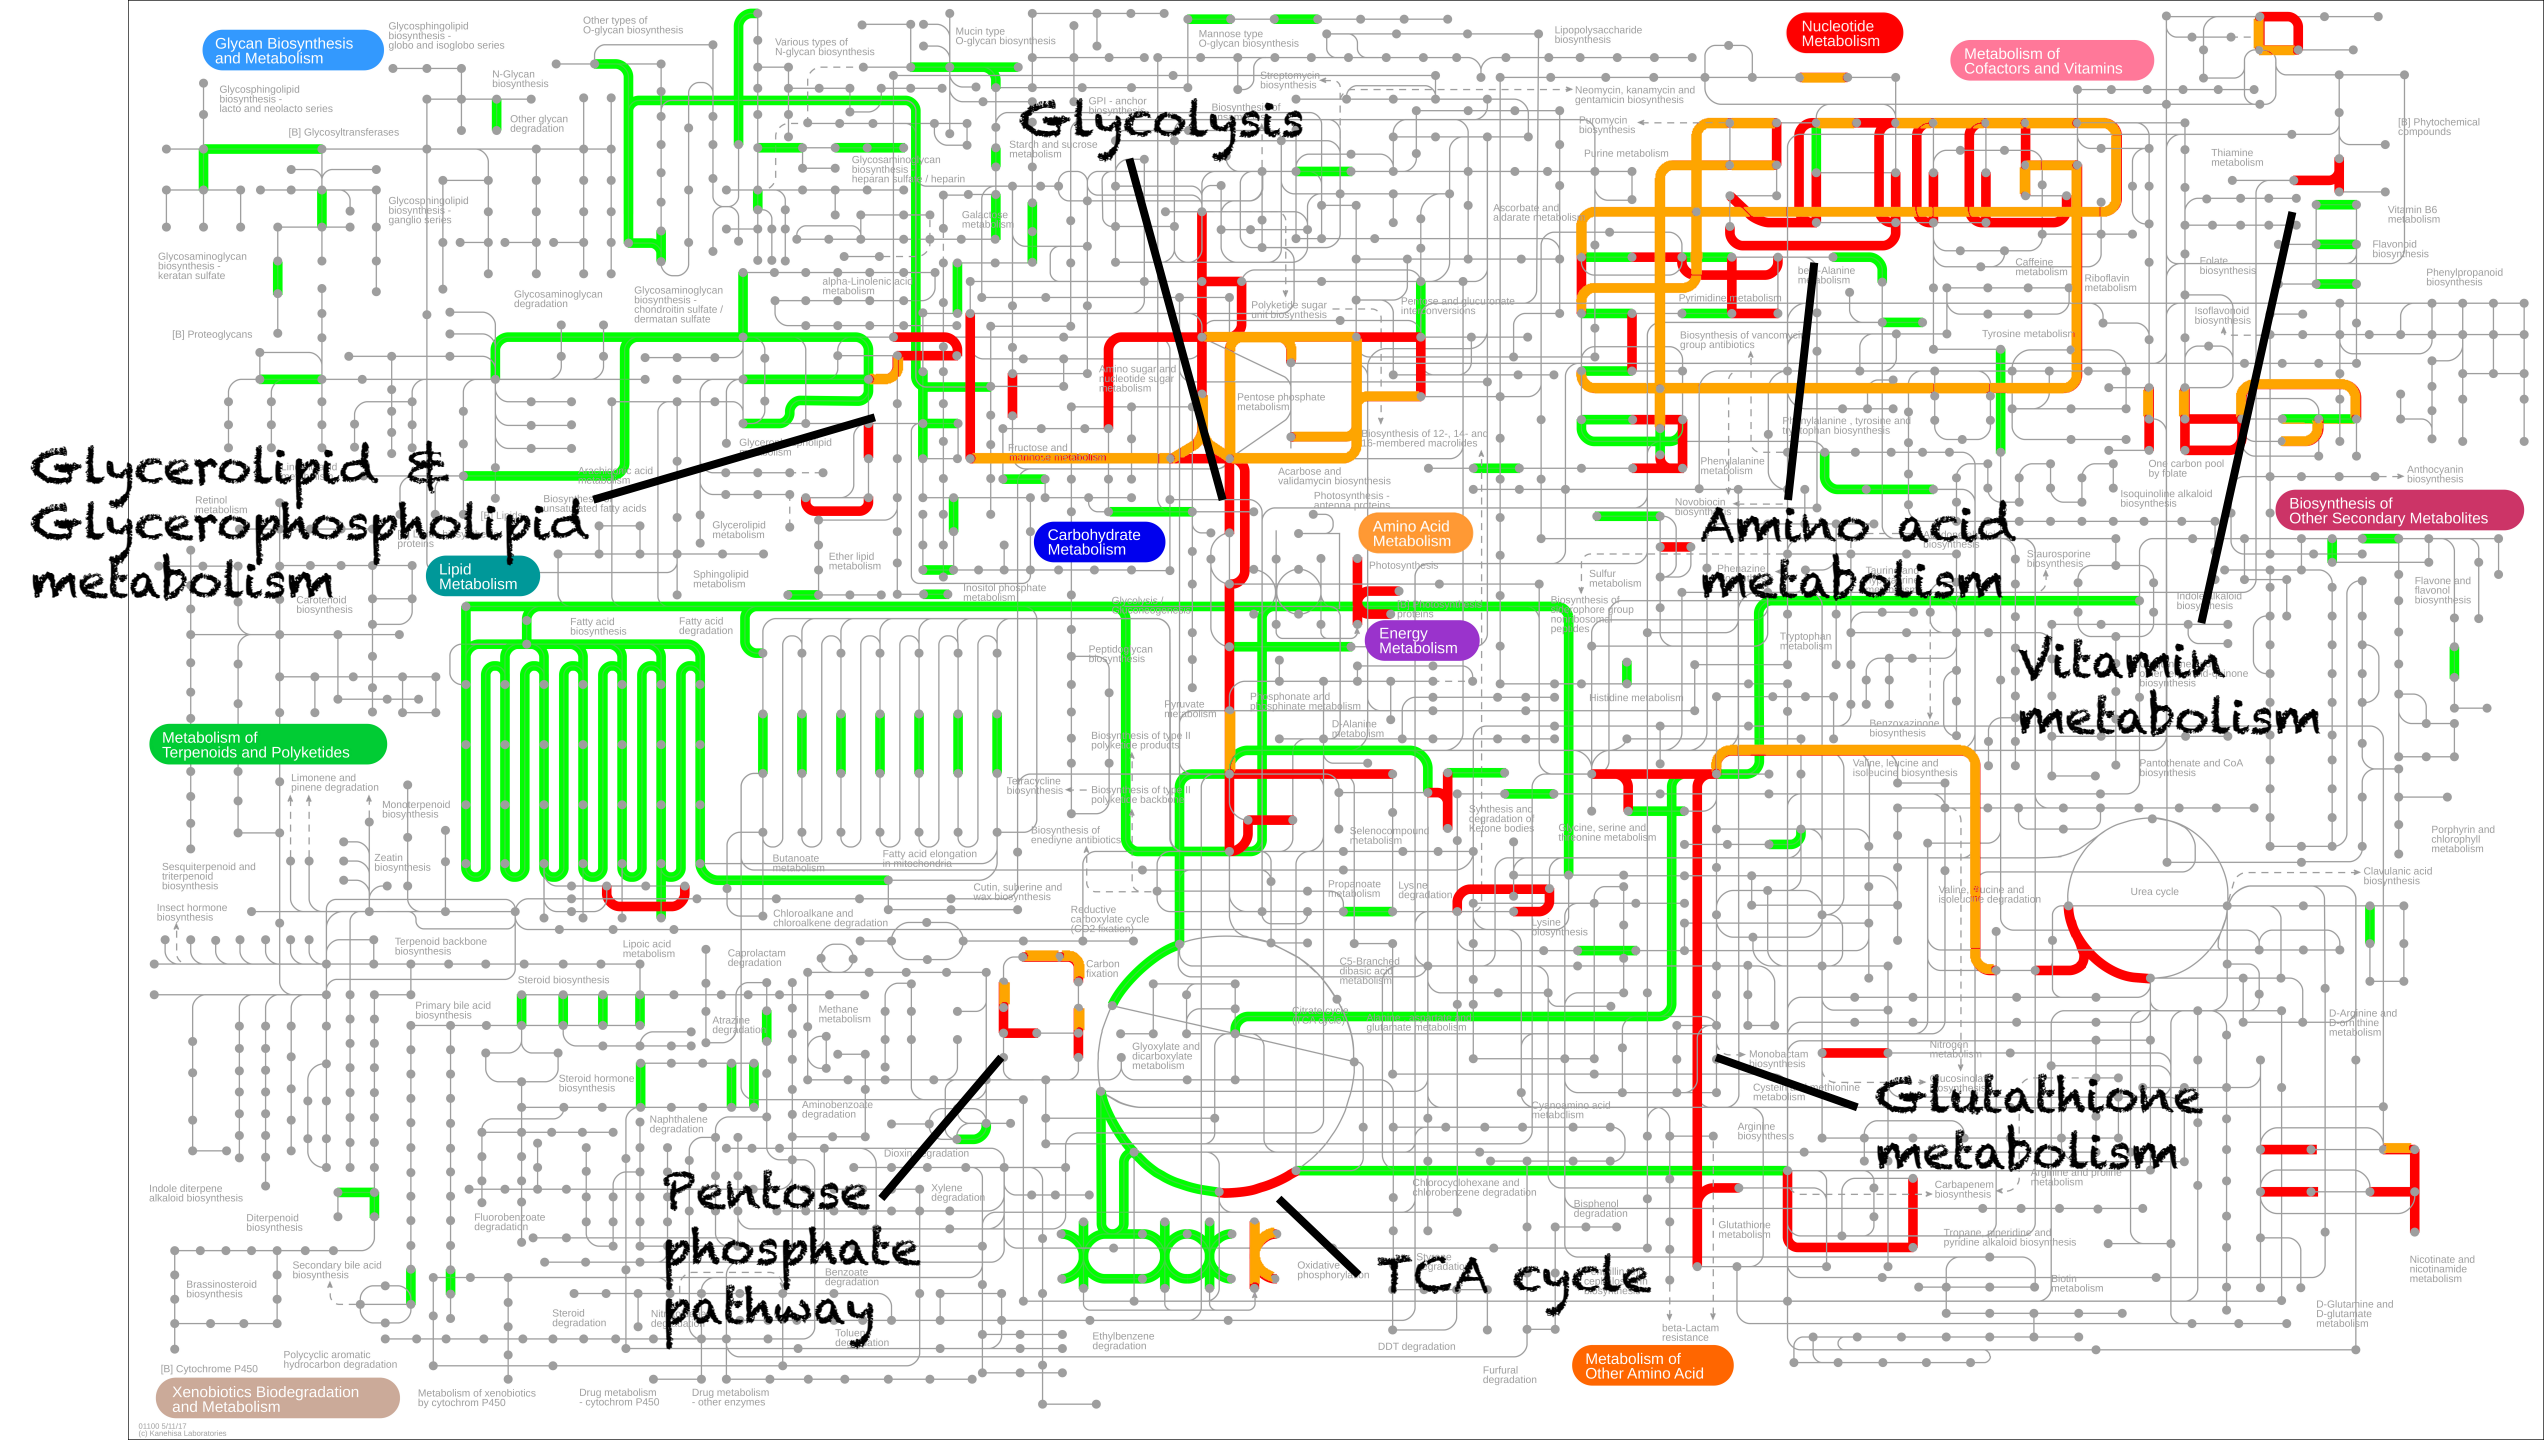

# Glycerolipid & Glycerophospholipid metabolism

# Glycolysis

# Amino acid metabolism

# Vitamin metabolism

# Pentose phosphate pathway

# TCA cycle

# Glutathione metabolism

Xenobiotics Biodegradation and Metabolism

Metabolism of Other Amino Acid
