# Supplementary material for: Genome-resolved insights into a novel Spiroplasma symbiont of the Wheat Stem Sawfly (Cephus cinctus)
Source: PeerJ. 2019 Aug 27;7:e7548. doi: 10.7717/peerj.7548 (PMC6716498; doi:10.7717/peerj.7548)
Supplement: Table S3 — Longitudinal metabolomic analyses of cultivation efforts showing metabolites whose concentrations were deferentially altered (highlighted green) and others that were detected. [file peerj-07-7548-s005.csv]

	relative concentration/200ul media
metabolite	rep1_ day 1	rep1_ day 2	rep1_ day 3	rep1_ day 5	rep2_ day 1	rep2_ day 2	rep2_ day 3	rep2_ day 5	rep3_ day 1	rep3_ day 2	rep3_ day 3	rep3_ day 5
CYSTEINE	73.9	53.6	65.2	69.4	72.6	68.9	80.4	63.1	84.1	59.7	63.4	63.7
pyruvic acid	20.8	11.3	9.6	6.7	16.9	14.1	10.2	7.6	19.4	9.5	7.9	6.0
serine	2730.1	2572.8	2686.6	3043.6	2483.1	2677.7	2728.9	3522.6	2564.4	2369.5	2691.1	3217.8
trehalose	5794.2	5096.6	4635.6	4572.0	5661.2	5404.0	4634.4	6124.7	5477.4	4907.4	4709.8	4797.0
2-aminoethylglycerophosphate	85.1	97.8	104.3	112.3	89.9	92.0	95.1	113.7	112.3	113.4	98.9	128.5
3,4-Dihydroxybutanoic acid	31.5	30.6	33.3	37.5	26.3	31.8	31.5	33.0	27.6	27.0	30.5	42.4
Alanine	3676.3	3242.7	3504.5	3826.6	2772.9	3484.2	3537.5	4246.3	3376.9	2805.2	3584.9	4149.5
Allantoin	11.4	14.7	39.9	22.3	10.4	18.8	18.0	7.7	14.5	18.8	40.8	25.5
Arginine	83.1	96.5	142.7	140.1	100.8	94.1	136.6	116.9	128.9	95.4	123.0	155.0
aspartic acid	2505.2	3567.8	3501.3	1358.2	3172.2	2193.8	3506.3	4664.5	3323.4	2839.9	3569.0	4234.8
galactose	1088.4	6789.1	4829.9	2264.6	2576.1	2159.0	3161.6	9395.7	1268.3	7527.5	6926.5	8962.3
Glycolic acid	25.4	26.4	29.0	43.3	24.4	25.5	29.4	42.6	22.9	24.0	29.2	44.6
proline	1404.0	1976.1	2454.1	3100.2	1233.9	1991.0	2504.3	3285.5	1335.5	1759.0	2423.8	3399.4
pyroglutamic acid	4593.5	5948.8	5657.1	7375.1	4392.6	6052.9	5350.3	6822.4	3462.0	5460.9	5957.7	6633.0
serine	2730.1	2572.8	2686.6	3043.6	2483.1	2677.7	2728.9	3522.6	2564.4	2369.5	2691.1	3217.8
Tyrosine	1184.0	1291.3	1389.6	1661.6	1087.1	1348.2	1391.6	1827.1	1055.7	1201.1	1427.1	1717.9
Uridine	55.6	80.7	87.4	113.2	59.8	85.9	87.3	110.7	67.5	65.8	83.4	104.9
valine	3033.0	3072.2	3323.8	3764.8	2813.5	3269.5	3340.0	4037.3	3044.2	2815.6	3283.3	3979.0
Xanthine	27.1	41.7	41.4	70.2	27.7	37.4	47.6	66.8	28.4	32.6	46.0	66.7
1-Monohexadecanoylglycerol	8.0				10.6	6.0				10.1
1-Monooctadecanoylglycerol	9.5		9.3	7.5	10.2	8.0			9.6	8.5		7.6
2-aminoethylglycerophosphate	85.1	97.8	104.3	112.3	89.9	92.0	95.1	113.7	112.3	113.4	98.9	128.5
2-Keto-L-gluconic acid	2.4	0.9	1.8	3.3	3.0	1.9	1.8	0.9	1.6	0.8	1.3	1.9
2-METHYLSERINE	3.4		1.7				2.9		2.8
2-Methylsuccinic acid	0.2	0.4	0.5	0.3	0.4	0.5	1.2	0.4	0.4	1.3	1.1	0.4
3,4-Dihydroxybutanoic acid	31.5	30.6	33.3	37.5	26.3	31.8	31.5	33.0	27.6	27.0	30.5	42.4
3-HYDROXYBUTANOIC ACID	33.0	31.0	30.5	32.9	29.3	32.5	30.0	21.1	32.8	28.5	30.8	32.8
4-Hydroxyproline	43.4	32.1	32.1	37.8	31.3	33.9	35.9	40.7	31.5	12.2	38.3	39.4
5-Methylthioadenosine					3.8	3.4			4.2
Adenine	21.6	15.9	16.1	26.9	13.9	17.5	20.8	26.5	15.4	16.8	30.9	21.0
Adenosine	22.3								15.0
Adenosine-5-monophosphate		12.4	23.4	15.0	46.5	13.0	13.0		8.5	10.9	18.2	12.3
Alanine	3676.3	3242.7	3504.5	3826.6	2772.9	3484.2	3537.5	4246.3	3376.9	2805.2	3584.9	4149.5
Allantoin	11.4	14.7	39.9	22.3	10.4	18.8	18.0	7.7	14.5	18.8	40.8	25.5
aminomalonic acid	36.3	23.6	27.7	34.4	15.6	40.7	31.7	53.1	23.1	21.1	30.0	25.2
arabinose	3.0	8.1	5.7	4.7	2.9	14.5	14.1	5.3	2.5	7.0	6.5	6.0
arabitol	43.1	38.6	45.1	42.4	37.1	41.2	39.1	45.1	37.5	37.1	46.1	52.6
Arginine	83.1	96.5	142.7	140.1	100.8	94.1	136.6	116.9	128.9	95.4	123.0	155.0
asparagine	779.8	785.5	813.8	999.5	759.3	817.3	790.6	778.8	701.9	659.6	787.6	908.9
aspartic acid	2505.2	3567.8	3501.3	1358.2	3172.2	2193.8	3506.3	4664.5	3323.4	2839.9	3569.0	4234.8
B-alanine	10.1	9.8	9.0	9.9	7.9	8.8	8.2	6.9	9.0	8.1	7.6	9.0
Butane, 2,3-dihydroxy	5.7	4.0	4.3	4.1	3.8	4.6	3.3	5.4	1.6	4.2	3.9	3.7
Butanoic acid, 2,4-dihydroxy	87.0	62.6	74.4	69.0	76.1	79.7	73.7	73.5	69.1	68.8	74.9	85.3
Butanoic acid, 2-hydroxy	3.6	3.9	4.6	4.4	3.7	3.8	3.9	4.3	4.1	2.9	3.4	4.5
Butanoic acid, 2-methyl-2-hydroxy	7.3	6.7	6.5	6.9	7.3	7.1	6.9	6.2	6.6	6.8	6.5	7.3
Butanoic acid, 3-methyl-3-hydroxy	1.0	1.8	2.4	0.8		2.5	0.9		1.7	1.8	1.7	1.0
butanoic acid, 4-hydroxy	5.1	4.0	4.2	4.2	3.7	3.9	3.7	4.2	3.8	3.6	3.2	4.0
Cholesterol	88.5	80.3	76.7	83.6	88.4	84.5	84.9	106.5	83.0	82.0	80.9	94.4
Citric acid	294.9	263.0	325.1	343.2	203.1	212.5	323.7	249.3	216.5	194.4	202.0	235.1
CYSTEINE	73.9	53.6	65.2	69.4	72.6	68.9	80.4	63.1	84.1	59.7	63.4	63.7
Cytosine	1.6	1.7	1.4	1.4	1.2	1.6			1.2	1.3	1.6	1.7
Decanoic acid	1.3		0.8		0.7	0.6					0.8
Dopamine					12.6	4.3			13.8	5.8	5.0	5.0
Erythritol	317.8	269.2	270.7	290.9	264.0	284.2	270.4	313.7	276.4	255.2	268.9	307.4
Erythronic acid	72.6	57.5	55.8	76.6	62.9	70.5	69.0	69.5	54.1	51.8	57.0	12.0
erythrose 4-phosphate	29.5	33.3	38.3	22.7	28.3	38.3	36.7	19.8	46.8	36.7	36.0	18.3
ethanolamine	57.0	49.5	29.5	50.1	52.7	53.2	30.8	34.1	55.6	48.5	53.8	34.7
fructose	4387.7	3387.9	3944.1	4135.0	4213.6	4046.5	3948.3	4081.9	4143.7	3224.2	3589.8	3758.2
Fumaric acid	11.6	9.8	8.5	8.9	9.9	9.9	9.3	6.8	9.7	10.3	9.4	8.3
GABA	215.0	171.2	186.7	195.1	191.0	193.5	190.8	205.1	198.6	163.6	181.6	202.8
galactose	1088.4	6789.1	4829.9	2264.6	2576.1	2159.0	3161.6	9395.7	1268.3	7527.5	6926.5	8962.3
Gluconic acid	11.7	8.7	11.1	11.3	5.5	9.8	7.2	11.7	8.6	11.8	13.4	24.4
AA-glucose	46733.9	44894.1	42566.4	45292.2	45330.3	43014.5	41027.2	63244.0	41836.3	43552.0	43251.5	49152.3
Glutamic acid	3025.0	2755.0	3238.3	3067.1	3342.5	2860.6	3255.1	3547.0	3191.2	2450.4	2951.3	3315.3
Glutamine	19.7	23.6	68.4	28.1	76.5	24.1	70.6	36.2	80.7	17.5	43.4	45.9
Glutaric acid	1.7	1.5	2.6	1.2	3.1	3.0	1.8	1.6	1.5	1.3	1.3	2.6
Glutaric acid, 2-hydroxy	16.7	15.9	16.1	16.1	15.7	16.4	14.9	17.1	16.9	13.9	15.1	16.2
Glyceric acid	43.6	40.2	42.6	50.5	34.9	42.3	44.0	59.7	40.3	39.5	43.0	56.7
Glycerol	1072.4	995.3	926.0	1066.9	977.8	1062.8	932.2	1165.8	1031.1	923.1	988.3	1119.1
glycerol-3-p	431.9	442.4	418.9	447.9	406.0	431.6	423.9	411.0	430.2	416.4	416.6	447.1
glycine	2059.1	1981.4	2072.6	2454.9	1712.8	2077.1	2106.4	2770.0	1797.7	1786.0	2084.9	2562.6
Glycolic acid	25.4	26.4	29.0	43.3	24.4	25.5	29.4	42.6	22.9	24.0	29.2	44.6
glyoxylic acid		3.0	4.2	3.5	2.6		3.9	3.9	3.8	4.9	5.0	4.8
Guanine	8.9	13.9	10.8	3.5	8.6	13.3	13.7	15.1	10.1	13.2	13.5	13.9
Guanosine	70.0	88.4	99.6	124.6	78.6	91.1	98.4	96.4	80.5	83.1	94.4	123.2
HEXANOIC ACID	1.1	0.6	0.6	1.8	1.1	2.0	1.2	0.6	0.8	0.7	1.1	1.5
Histidine	38.5	107.3	193.8	176.5	121.8	106.1	229.0	142.4	128.7	132.5	186.7	217.6
Homocysteine	4.2	5.2	5.9	8.9	4.6	5.0	7.1	8.7	4.4	7.1	6.8	9.1
Homoserine	13.7	11.7	14.2	16.2	11.0	12.8	14.1	13.0	12.6	7.6	13.0	16.0
Hypoxanthine	41.1	64.2	94.9	155.6	37.4	10.4	94.0	147.4	45.9	64.6	121.4	114.9
Inosine	542.1	523.6	457.2	490.5	549.1	508.5	458.3	486.9	621.2	487.0	489.4	463.3
Inositol, myo	1506.0	1351.0	1348.3	1636.4	1358.7	1450.2	1409.3	1732.5	1384.4	1272.2	1347.8	1523.5
Inositol-2-p	21.7	29.2	102.7	27.5	50.3	24.2	23.9	63.3	25.2	29.5	29.8	37.2
Isoleucine	3139.5	3168.4	3212.1	3705.2	2652.7	3117.5	3250.0	4176.8	2813.0	2787.4	3205.3	3941.2
lactamide	1.2	0.6	2.3		1.8	1.1	1.8		1.8		1.2	0.7
lactic acid	4176.9	3548.5	3431.7	3793.1	3320.2	3809.6	3450.3	4243.1	3590.4	3407.9	3445.1	3894.9
lactose	438.2	307.5	369.8	411.8	450.9	406.0	412.9	374.1	463.2	301.6	310.0	311.5
leucine	328.0	301.4	262.3	435.7	292.8	361.4	279.3	7667.8	207.9	1338.5	4693.8	361.3
lysine	8250.8	7975.4	8095.3	8950.4	7951.9	7655.2	8365.1	10025.9	8181.1	7514.6	7820.6	8606.8
Malic acid	86.9	70.0	70.1	74.7	75.0	80.6	70.5	88.4	72.7	70.9	68.6	86.4
Malonic acid	1.1	0.5	0.2		0.2	0.2	0.2		0.2			0.9
maltose	7.0	58.0	106.3	28.7	26.7	31.7	30.7	78.9	60.9	76.3	65.8	82.7
mannitol	65.5	74.8	87.5	74.4	57.3	88.1	93.8	55.3	67.0	68.1	85.6	95.4
mannose	250.4	70.6	178.1	181.0	150.1	148.5	140.9	195.2	176.0	57.0	91.7	99.2
methionine	787.3	690.6	719.8	892.5	652.8	703.4	727.0	900.7	647.5	648.2	720.8	764.3
METHYLCYTOSINE		1.5	0.9		0.8	1.1	0.6		1.0	4.8	1.7	1.4
mimosine	9.5	8.7	11.7	12.4	8.0	10.3	11.7	9.6	8.8	9.4	11.6	14.2
N-a-Acetyl-L-Lysine	592.5	580.8	535.5	624.9	471.3	665.0	556.2	899.0	458.0	547.4	603.9	781.9
N-Acetylglutamic acid	87.2	95.8	28.1	113.8	84.2	92.3	90.9	139.1	65.5	98.8	85.5	104.5
N-acetyltryptophan	143.0	24.7	22.1	42.5	30.3	43.3	32.0	63.8	26.4	29.3	30.7	50.2
NICOTINAMIDE	22.0	20.6	23.7	22.5	24.5	24.3	25.2	25.7	24.4	21.3	24.8	25.5
N-methylalanine	9.9	6.5	7.5	6.8	6.8	7.5	7.1	7.1	19.4	5.5	7.8	8.0
ornitine	746.8	655.3	786.0	866.4	712.1	716.3	793.6	883.1	732.8	577.3	744.0	893.0
oxalic acid	3.9	3.3	2.8	2.5	3.1	3.3	2.6	0.6	2.5	2.0	2.5	1.4
p-Aminobenzoic acid	3.3	1.8	2.2	2.1	2.5	2.6	2.3	3.3	2.3	2.0	1.6	2.0
Panthotenic acid	52.7	42.2	49.2	51.6	48.8	47.4	48.5	50.0	59.7	38.2	41.7	39.1
Pentanoic acid, 3-methyl-2-hydroxy	0.4	0.4	1.0	0.4	0.2	0.6	1.4	0.1	0.8	1.7	0.3	0.5
phenylalanine	3059.8	2903.0	2996.7	3381.2	2774.1	3032.6	3074.4	3700.8	2920.7	2717.2	2997.3	3505.2
Phosphoglycolic acid			2.8	6.0			2.5	6.2			2.1	7.7
phosphoric acid	7415.2	8496.9	8386.3	9088.2	8518.9	8594.2	8500.2	7646.0	7600.7	7582.7	4652.4	9050.2
PIPECOLIC ACID	237.5	201.3	223.2	305.8	152.2	139.8	174.7	598.1	187.6	185.4	257.0	266.8
proline	1404.0	1976.1	2454.1	3100.2	1233.9	1991.0	2504.3	3285.5	1335.5	1759.0	2423.8	3399.4
Propanoic acid, 2-methyl-2,3-dihydroxy								83.6	110.3
Propanoic acid, 3-hydroxy	34.0	6.5			29.5	32.5		36.3	30.1			33.8
Pyrimidine, 4,5-dimethyl-2,6-dihydroxy	3.2	2.6	2.7	2.5	3.4	3.2	3.2	1.7	2.8	0.9	2.9	2.9
pyroglutamic acid	4593.5	5948.8	5657.1	7375.1	4392.6	6052.9	5350.3	6822.4	3462.0	5460.9	5957.7	6633.0
pyruvic acid	20.8	11.3	9.6	6.7	16.9	14.1	10.2	7.6	19.4	9.5	7.9	6.0
RIBITOL	30.6	32.9	26.4	30.5	28.1	29.3	27.8	32.8	27.7	31.3	32.7	37.7
Ribose	16.9	14.5	15.3	23.3	12.8	18.9	25.1	32.1	15.5	15.4	14.6	29.8
RIBOSE-5-P	4.4	3.5	3.9	6.7	11.1	7.2	11.8	2.8	8.9	8.5	3.5	8.9
Sedoheptulose	22.5	13.8	16.4	18.6	17.1	17.9	15.0	14.8	22.2	12.3	12.2	12.5
Sedoheptulose-7-p	9.0	18.8	6.9	32.2	7.6	18.2	26.6	28.4	7.7	10.6	11.9	15.8
serine	2730.1	2572.8	2686.6	3043.6	2483.1	2677.7	2728.9	3522.6	2564.4	2369.5	2691.1	3217.8
S-Methyl-L-cysteine	0.4	1.5	1.2	0.9	1.0	1.2	0.3	1.1	1.7	1.1	1.0	1.5
Sorbitol	827.2	737.5	796.3	804.8	736.6	815.3	790.3	909.7	804.9	689.9	772.3	805.6
SPERMIDINE	17.3	7.3	32.5	8.1	20.8	8.9	12.2	27.9	23.5	21.1	8.8	4.2
Succinic acid	693.6	601.1	588.6	640.0	578.3	628.3	592.8	652.1	607.6	550.5	589.3	661.1
sucrose	4.4	52.1	45.6	3.7	4.1	5.3	4.7	60.5	3.6	61.8	57.2	70.5
threitol		24.3	21.1		24.2	28.6	22.6		23.9		23.1
Threonic acid	9.6	9.8	10.6	11.5	8.9	12.7	8.9	11.8	9.8	8.4	9.7	69.4
Threonine	5909.2	5326.1	5402.5	5008.2	5058.6	5559.4	4196.9	6664.2	4736.2	4872.1	5462.1	6286.2
Thymine	1.6	1.7	1.6	1.9	1.4	1.9	1.6	2.1	1.8	1.7	1.6	1.9
trehalose	5794.2	5096.6	4635.6	4572.0	5661.2	5404.0	4634.4	6124.7	5477.4	4907.4	4709.8	4797.0
trehalose-6-p	7.7	11.0	11.6	13.7	11.0	11.0	11.0	12.4	10.9	14.3	13.0	14.1
tryptophan	898.4	1032.4	1073.6	1168.6	961.5	1044.8	1094.9	1071.8	1021.2	991.4	1053.6	1175.8
tyramine				5.7				5.0				4.3
Tyrosine	1184.0	1291.3	1389.6	1661.6	1087.1	1348.2	1391.6	1827.1	1055.7	1201.1	1427.1	1717.9
uracil	78.6	68.6	64.6	72.7	63.5	71.6	65.3	86.7	67.1	62.2	66.5	74.0
UREA	907.9	786.0	816.9	899.6	773.1	812.1	747.2	990.4	759.8	701.3	739.8	912.0
Uric acid								16.9			18.5	22.0
Uridine	55.6	80.7	87.4	113.2	59.8	85.9	87.3	110.7	67.5	65.8	83.4	104.9
valine	3033.0	3072.2	3323.8	3764.8	2813.5	3269.5	3340.0	4037.3	3044.2	2815.6	3283.3	3979.0
Xanthine	27.1	41.7	41.4	70.2	27.7	37.4	47.6	66.8	28.4	32.6	46.0	66.7
Xylitol	14.7	11.4	10.4	12.2	7.9	11.3	9.6	15.5	11.7	11.8	16.2	15.9
